# Supplementary material
Source: HighWire-hosted journal article supplement (https://qualitysafety.bmj.com/content/29/4/320)
Supplement: inline-supplementary-material-3 [file inline-supplementary-material-3.pdf]

Supplementary Table - Variance Matrix for Decontamination

| Task                              | Performance shaping factors                                                                                    | Failure                             | Process variance                                    | Outcome variance                                                             | Observed controls                                                                                                                                                                                                                                                                                                                                                                                                                                                                        |
|-----------------------------------|----------------------------------------------------------------------------------------------------------------|-------------------------------------|-----------------------------------------------------|------------------------------------------------------------------------------|------------------------------------------------------------------------------------------------------------------------------------------------------------------------------------------------------------------------------------------------------------------------------------------------------------------------------------------------------------------------------------------------------------------------------------------------------------------------------------------|
| Perform point of use reprocessing | OR staff KSAs (Person)<br>OR production pressure (Organization)<br>Enzymatic spray availability (Organization) | Tray not sprayed                    | Prolonged or different cleaning required            | Reduced throughput<br>Tray defect (bioburden)                                | <ul style="list-style-type: none"> <li>Develop feedback mechanism to capture and communicate state of trays received in decontamination (Tools/Technology &amp; Task)</li> <li>Include time in SPD as part of scrub nurse and technician training (Organization)</li> <li>Assign technician to point of use area to assist with reprocessing (Organization)</li> <li>Create point of use reprocessing instructions for OR, clinics, and ambulatory centers (Tools/Technology)</li> </ul> |
|                                   | OR staff KSAs (Person)<br>OR production pressure (Organization)                                                | Tray not organized                  | Prolonged time removing instruments from tray       | Reduced throughput<br>Staff injury (sharp)                                   |                                                                                                                                                                                                                                                                                                                                                                                                                                                                                          |
|                                   |                                                                                                                | Instruments in wrong trays          | Prolonged assembly process                          | Reduced throughput<br>Staff injury (sharp)<br>Tray defect (wrong instrument) |                                                                                                                                                                                                                                                                                                                                                                                                                                                                                          |
|                                   |                                                                                                                | Instruments lost                    | Prolonged assembly process                          | Reduced throughput<br>Tray defect (missing instrument)<br>Inventory costs    |                                                                                                                                                                                                                                                                                                                                                                                                                                                                                          |
| Retrieve case                     | Demand variation (Task)<br>SPD staffing (Organization)                                                         | Task interruption and fragmentation | Reprocessing paused to retrieve new carts and trays | Reduced throughput<br>Tray defect (bioburden)                                | <ul style="list-style-type: none"> <li>Delegate experienced technician to manage decontamination area (Person)</li> </ul>                                                                                                                                                                                                                                                                                                                                                                |

| Task                                                | Performance shaping factors                                                            | Failure                                                                      | Process variance                               | Outcome variance                     | Observed controls                                                                                                                                                                                                                |
|-----------------------------------------------------|----------------------------------------------------------------------------------------|------------------------------------------------------------------------------|------------------------------------------------|--------------------------------------|----------------------------------------------------------------------------------------------------------------------------------------------------------------------------------------------------------------------------------|
| carts                                               | OR production pressure (Organization)                                                  | Contaminants dried on instruments                                            | Prolonged or different cleaning required       | Inventory costs<br>Instrument damage | <ul style="list-style-type: none"> <li>Assign technician to point of use area to assist with reprocessing and flow of case carts into SPD (Organization)</li> <li>Designate specific receiving times for trays (Task)</li> </ul> |
|                                                     |                                                                                        | Lack of space for case carts and trays                                       | Time spent rearranging carts                   | Reduced throughput                   |                                                                                                                                                                                                                                  |
| Run case carts through washer                       | Cart washer design (External)<br>SPD staff KSAs (Person)                               | Carts and containers inappropriately arranged in washer                      | Less effective cleaning of cart and containers | Reduced throughput                   | <ul style="list-style-type: none"> <li>Display proper orientation of carts into cart washer (Tools/Technology)</li> <li>Assign technician to point of use area to control flow of case carts into SPD (Organization)</li> </ul>  |
|                                                     | No. of cart washer (Organization)                                                      | Insufficient capacity                                                        | Delays and backup of case carts                |                                      |                                                                                                                                                                                                                                  |
| Setup workstation                                   | Workstation (Tools/Technology)<br>Instrument IFU (External)<br>SPD staff KSAs (Person) | Incorrect water temperature                                                  | Less effective cleaning                        | Tray defect (bioburden)              | <ul style="list-style-type: none"> <li>Display soaking procedures (fill level, temperature, time, etc....) (Tools/Technology)</li> </ul>                                                                                         |
|                                                     |                                                                                        | Incorrect dosage of cleaning fluid                                           |                                                | Reduced throughput                   |                                                                                                                                                                                                                                  |
|                                                     |                                                                                        | Did not collect all the correct tools                                        | Excessive physical movement                    | Reduced throughput                   |                                                                                                                                                                                                                                  |
| Manually wash instruments<br><br>(For hand-wash and | Workstation (Tools/Technology)                                                         | Surfaces insufficient for unpacking, washing, soaking, rinsing and repacking | Excessive physical movement                    | Reduced throughput                   | <ul style="list-style-type: none"> <li>Design or redesign decontamination area (lighting, layout, workstations) (Environment)</li> </ul>                                                                                         |
|                                                     |                                                                                        |                                                                              | Mixing of cleaned and uncleaned instruments    | Tray defect (bioburden)              |                                                                                                                                                                                                                                  |

| Task                                                            | Performance shaping factors                                                                                                    | Failure                                                        | Process variance                                     | Outcome variance                                                        | Observed controls                                                                                                                                                                                                                                                                             |
|-----------------------------------------------------------------|--------------------------------------------------------------------------------------------------------------------------------|----------------------------------------------------------------|------------------------------------------------------|-------------------------------------------------------------------------|-----------------------------------------------------------------------------------------------------------------------------------------------------------------------------------------------------------------------------------------------------------------------------------------------|
| manual wash instrument)                                         |                                                                                                                                | Insufficient task lighting                                     | Reduced ability to identify bioburden                |                                                                         |                                                                                                                                                                                                                                                                                               |
|                                                                 | Instrument design (External)<br>Instrument IFU (External)<br>SPD staff KSAs (Person)<br>SPD Production pressure (Organization) | Instrument not disassembled<br><br>Incorrect cleaning strategy | Ineffective cleaning of instrument                   | Instrument damage<br><br>Inventory costs<br><br>Tray defect (bioburden) | <ul style="list-style-type: none"> <li>• Ensure easy accessibility of IFUs (Tool/Technology &amp; Environment)</li> <li>• Remedial training (Person)</li> <li>• Provide all necessary cleaning tools for manual wash (Tools/Technology)</li> </ul>                                            |
| Soak instruments in trays<br><br>(Manual wash instruments only) | Workstation (Tools/Technology)<br><br>Instrument IFU (External)<br><br>SPD staff KSAs (Person)                                 | Incorrect water temperature                                    | Ineffective or less effective cleaning of instrument | Tray defect (bioburden)                                                 | <ul style="list-style-type: none"> <li>• Remedial training (Person)</li> <li>• Display soaking procedures (fill level, temperature, time, etc....) (Tools/Technology)</li> <li>• Replace sinks with shallower sinks, and adjustable or appropriate percentile height (Environment)</li> </ul> |
|                                                                 |                                                                                                                                | Incorrect dosage of cleaning fluid                             |                                                      |                                                                         |                                                                                                                                                                                                                                                                                               |
|                                                                 |                                                                                                                                | Insufficient soaking time                                      |                                                      |                                                                         |                                                                                                                                                                                                                                                                                               |
|                                                                 |                                                                                                                                | Contaminated water                                             |                                                      |                                                                         |                                                                                                                                                                                                                                                                                               |
|                                                                 | Workstation (Tools/Technology)                                                                                                 | Sink height too low                                            | Prolonged cleaning time                              | Reduced throughput                                                      | <ul style="list-style-type: none"> <li>• Ensure trays adhere to weight limits (Organization)</li> </ul>                                                                                                                                                                                       |
|                                                                 |                                                                                                                                | Sink depth too deep                                            | Staff fatigue                                        | Staff Injury (MSD)                                                      |                                                                                                                                                                                                                                                                                               |

| Task                                   | Performance shaping factors               | Failure                              | Process variance                                                 | Outcome variance                                                             | Observed controls                                                                                                                                                                                |
|----------------------------------------|-------------------------------------------|--------------------------------------|------------------------------------------------------------------|------------------------------------------------------------------------------|--------------------------------------------------------------------------------------------------------------------------------------------------------------------------------------------------|
| Run trays through ultrasonic cleaner   | Instrument design (External)              | Wrong cycle chosen                   | Less effective cleaning                                          | Tray defect (bioburden)                                                      | <ul style="list-style-type: none"> <li>• Remedial training (Person)</li> <li>• Display cycle selection guidelines near ultrasonic (Tools/Technology)</li> </ul>                                  |
|                                        | Ultrasonic cleaner design (External)      |                                      |                                                                  |                                                                              |                                                                                                                                                                                                  |
|                                        | SPD Staff KSAs (Person)                   |                                      |                                                                  |                                                                              |                                                                                                                                                                                                  |
|                                        | Tray composition (Organization)           | Wrong instruments                    | Inappropriate exposure to immersion, vibration, temperature etc. | Tray defect (bioburden)                                                      | <ul style="list-style-type: none"> <li>• Display sample or descriptions of instruments that should not undergo ultrasonic cleaning (Tools/Technology)</li> </ul>                                 |
|                                        | SPD staff KSAs (Organization)             |                                      |                                                                  |                                                                              |                                                                                                                                                                                                  |
|                                        | No. of ultrasonic cleaner (Organization)  | Insufficient capacity                | Less effective cleaning                                          | Tray defect (bioburden)                                                      | <ul style="list-style-type: none"> <li>• Develop preventative maintenance schedule with biomedical engineering services (Organization)</li> </ul>                                                |
| Tray composition (Organization)        |                                           |                                      |                                                                  |                                                                              |                                                                                                                                                                                                  |
| Instrument design (External)           |                                           |                                      |                                                                  |                                                                              |                                                                                                                                                                                                  |
| SPD production pressure (Organization) |                                           |                                      |                                                                  |                                                                              |                                                                                                                                                                                                  |
| Maintenance schedule (Organization)    |                                           |                                      |                                                                  |                                                                              |                                                                                                                                                                                                  |
| Run trays through washer-disinfector   | No. of washer-disinfectors (Organization) | Instruments run through wrong washer | Inappropriate exposure to enzymatic fluid; ineffective cleaning  | Instrument damage<br>Inventory costs<br>Reduced throughput<br>Patient injury | <ul style="list-style-type: none"> <li>• Remedial training (Person)</li> <li>• Display samples or descriptions of instruments that should not undergo machine wash (Tools/Technology)</li> </ul> |
|                                        | Washer-disinfector design (External)      |                                      |                                                                  |                                                                              |                                                                                                                                                                                                  |
|                                        | Tray composition (Organization)           | Wrong cycle chosen                   | Less effective cleaning                                          | Tray defect (bioburden)                                                      |                                                                                                                                                                                                  |

| Task         | Performance shaping factors                                          | Failure                            | Process variance                      | Outcome variance                              | Observed controls                                                                                                                                                                                                                                                                                                                                                 |
|--------------|----------------------------------------------------------------------|------------------------------------|---------------------------------------|-----------------------------------------------|-------------------------------------------------------------------------------------------------------------------------------------------------------------------------------------------------------------------------------------------------------------------------------------------------------------------------------------------------------------------|
|              | Instrument design (External)                                         | Tray oriented incorrectly          | Less effective cleaning               | Tray defect (bioburden)<br>Damaged washer     | <ul style="list-style-type: none"> <li>• Use washer racks that force correct tray orientation (Tools/Technology)</li> <li>• Use double-check procedure to verify orientation and allowable exposure (Task)</li> </ul>                                                                                                                                             |
|              |                                                                      | Wrong instruments put in washer    | Inappropriate exposure to immersion   | Instrument damage<br>Inventory costs          |                                                                                                                                                                                                                                                                                                                                                                   |
|              | Maintenance schedule (Organization)                                  | Drying cycle ineffective           | Prolonged assembly                    | Reduced throughput                            |                                                                                                                                                                                                                                                                                                                                                                   |
|              |                                                                      | Lubrication failure                | Increased risk of rust on instruments | Instrument damage<br>Inventory costs          |                                                                                                                                                                                                                                                                                                                                                                   |
| Test washers | SPD Staffing (Organization)<br>Communication (Organization)          | Failure to run routine test cycles | Less effective cleaning               | Tray defect (bioburden)                       | <ul style="list-style-type: none"> <li>• Remedial training (Person)</li> <li>• Incorporate verification of equipment testing into supervisor workflow (Task)</li> <li>• Develop preventative maintenance schedule with biomedical services (Organization)</li> <li>• Secure maintenance contract with vendor (Organization &amp; External Environment)</li> </ul> |
|              | Biomedical staffing (Organization)<br>Biomedical staff KSAs (Person) | Technology out of service          | Prolonged cleaning time               | Reduced throughput<br>Tray defect (bioburden) |                                                                                                                                                                                                                                                                                                                                                                   |
